# Supplementary material for: CTLA4-Linked Autoimmunity in the Pathogenesis of Endometriosis and Related Infertility: A Systematic Review
Source: MDPI journal article supplement (doi:10.3390/ijms231810902), 2022-09-18
Supplement: s1 [file s1]

**Supplementary Table S1: List of articles (PMID) excluded from the literature review**

|    | PMID     | Exclusion criteria          |
|----|----------|-----------------------------|
| 1  | 34656305 | Not including CTLA-4        |
| 2  | 34647523 | Not including CTLA-4        |
| 3  | 33947339 | Not including CTLA-4        |
| 4  | 33953208 | Not including CTLA-4        |
| 5  | 33428059 | Not including CTLA-4        |
| 6  | 33078970 | Not including CTLA-4        |
| 7  | 32711226 | Not including CTLA-4        |
| 8  | 31993049 | Not including CTLA-4        |
| 9  | 30784825 | Not including CTLA-4        |
| 10 | 30325236 | Not including CTLA-4        |
| 11 | 30595667 | Not including CTLA-4        |
| 12 | 29990511 | Review                      |
| 13 | 29845209 | Not including CTLA-4        |
| 14 | 29234882 | Not including CTLA-4        |
| 15 | 26959830 | Not including CTLA-4        |
| 16 | 25764161 | Not including CTLA-4        |
| 17 | 25367742 | Not including CTLA-4        |
| 18 | 22687138 | Not including endometriosis |
| 19 | 22652893 | Review                      |
| 20 | 20146732 | Not including CTLA-4        |
| 21 | 19300397 | Not including CTLA-4        |
| 22 | 18314122 | Not including CTLA-4        |
| 23 | 18405309 | Review                      |
| 24 | 17953947 | Not including CTLA-4        |
| 25 | 17509578 | Not including CTLA-4        |
| 26 | 18292821 | Not including CTLA-4        |
| 27 | 17118166 | Review                      |
| 28 | 16311290 | Not including CTLA-4        |
| 29 | 12447413 | Review                      |
| 30 | 11287041 | Not including CTLA-4        |
| 31 | 10333368 | Review                      |
| 32 | 35404426 | Not including CTLA-4        |
| 33 | 34865852 | Not including CTLA-4        |
| 34 | 32334621 | Not including CTLA-4        |
| 35 | 32231038 | Not including CTLA-4        |
| 36 | 30447298 | Not including CTLA-4        |
| 37 | 27488034 | Not including CTLA-4        |
| 38 | 21508908 | Not including CTLA-4        |

|    |          |                             |
|----|----------|-----------------------------|
| 39 | 20732991 | Not including CTLA-4        |
| 40 | 15831297 | Not including CTLA-4        |
| 41 | 35628346 | Review                      |
| 42 | 34945174 | Review                      |
| 43 | 34367125 | Not including anti-CTLA-4   |
| 44 | 34039410 | Not including CTLA-4        |
| 45 | 33505394 | Review                      |
| 46 | 33278837 | Review                      |
| 47 | 33147452 | Not including CTLA-4        |
| 48 | 32751735 | Not including CTLA-4        |
| 49 | 32666129 | Not including CTLA-4        |
| 50 | 32280445 | Not including CTLA-4        |
| 51 | 31985569 | Review                      |
| 52 | 31540116 | Not including CTLA-4        |
| 53 | 31418859 | Not including CTLA-4        |
| 54 | 34829910 | Not including CTLA-4        |
| 55 | 34501240 | Not including CTLA-4        |
| 56 | 34345285 | Not including CTLA-4        |
| 57 | 34103260 | Not including CTLA-4        |
| 58 | 33411080 | Review                      |
| 59 | 33209739 | Not including CTLA-4        |
| 60 | 32933042 | Not including CTLA-4        |
| 61 | 32698242 | Not including CTLA-4        |
| 62 | 32311852 | Not including CTLA-4        |
| 63 | 31869309 | Not including CTLA-4        |
| 64 | 31418859 | Not including CTLA-4        |
| 65 | 31099938 | Not including CTLA-4        |
| 66 | 30826860 | Review                      |
| 67 | 30684339 | Not including endometriosis |
| 68 | 30367890 | Not including CTLA-4        |
